# Supplementary material for: Modeling material transport regulation and traffic jam in neurons using PDE-constrained optimization
Source: PubMed Central journal article supplement (PMC8913697; doi:10.1038/s41598-022-07861-6), 2022-03-10
Supplement: 41598_2022_7861_MOESM1_ESM.pdf [file 41598_2022_7861_MOESM1_ESM.pdf]

**Supplementary Information**  
**Modeling material transport regulation and traffic jam in  
neurons using PDE-constrained optimization**

Angran Li and Yongjie Jessica Zhang

## Supplementary Figures

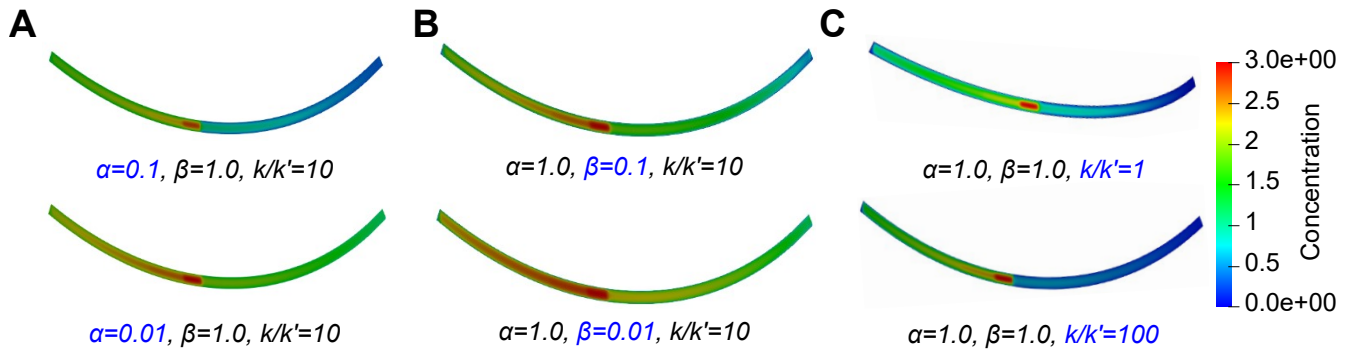

**Figure S1.** Parameter analysis in the single pipe geometry. The distribution of concentration affected by different settings of (A) penalty parameter  $\alpha$  for the cost to control high concentration gradient; (B) penalty parameter  $\beta$  for the cost of control force; and (C) the ratio between attachment rate  $k$  and detachment rate  $k'$ . Unit for color bars:  $\text{mol}/\mu\text{m}^3$ .

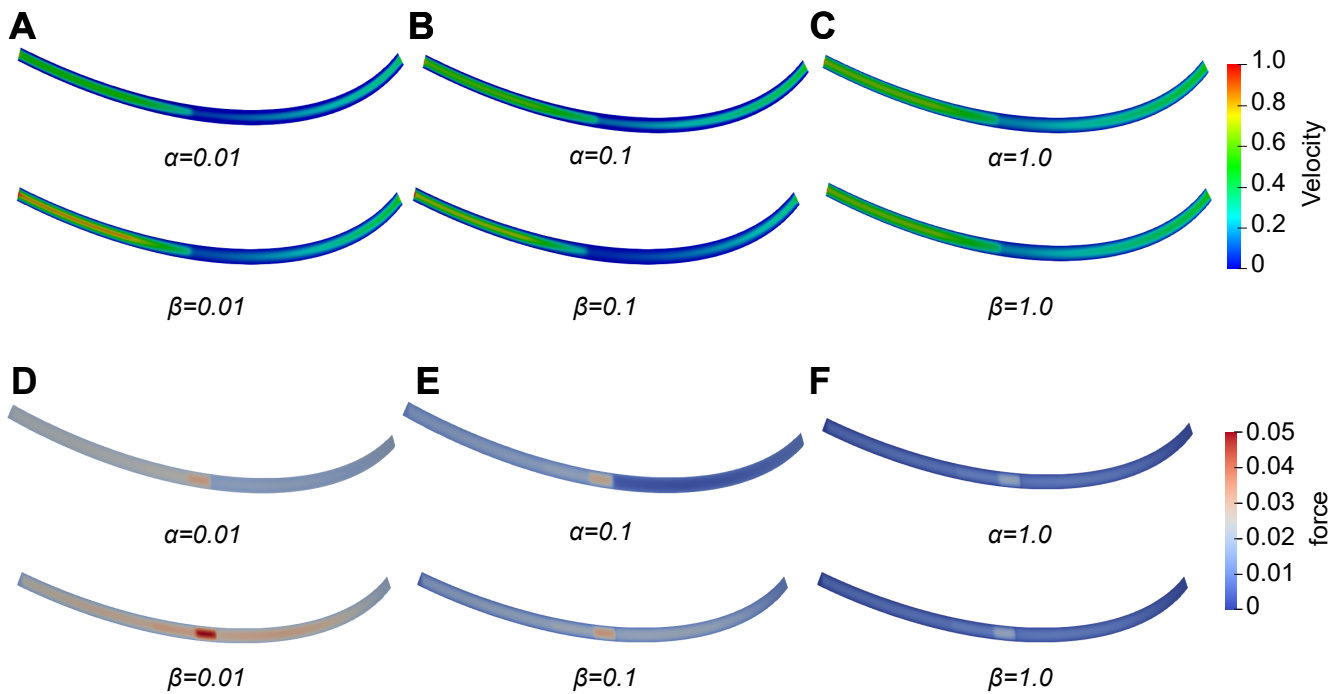

**Figure S2.** Simulation results in the single pipe geometry with different settings of penalty parameter  $\alpha$  and  $\beta$ . (A-C) Computed velocity field. (D-F) The distribution of control force. Unit for color bars: Velocity:  $\mu\text{m}/\text{s}$ ; Control force:  $\mu\text{m}/\text{s}^2$ .

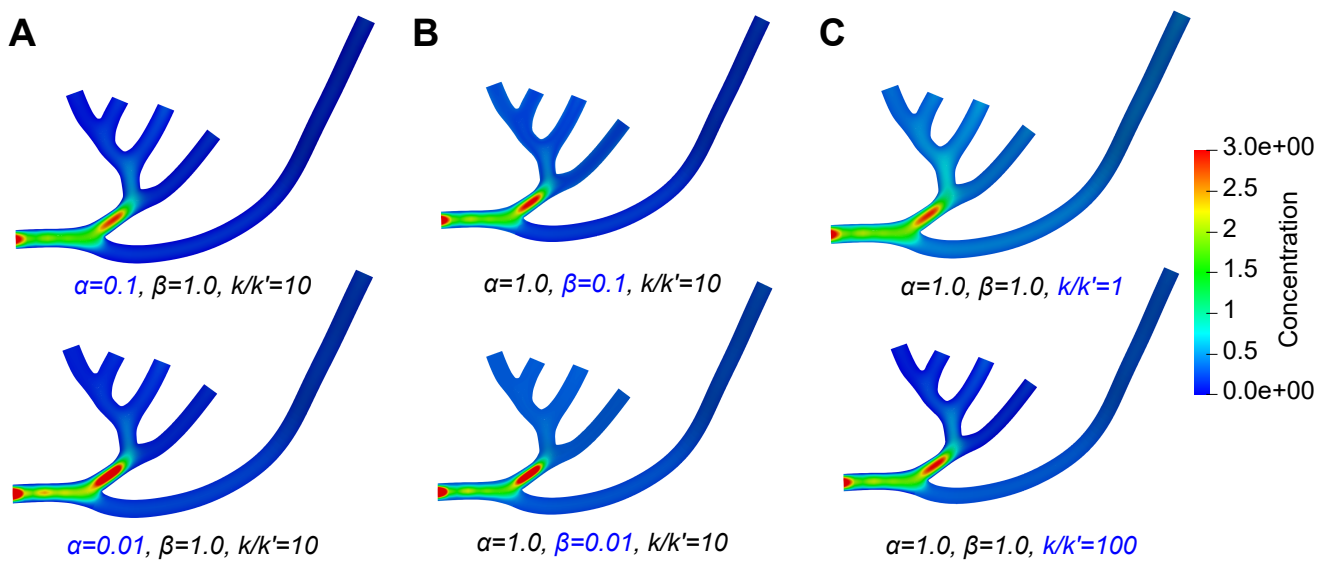

**Figure S3.** Parameter analysis in the neuron tree extracted from NMO\_54504. The distribution of concentration affected by different settings of (A) penalty parameter  $\alpha$  for the cost to control high concentration gradient; (B) penalty parameter  $\beta$  for the cost of control force; and (C) the ratio between attachment rate  $k$  and detachment rate  $k'$ . Unit for color bars:  $mol/\mu m^3$ .

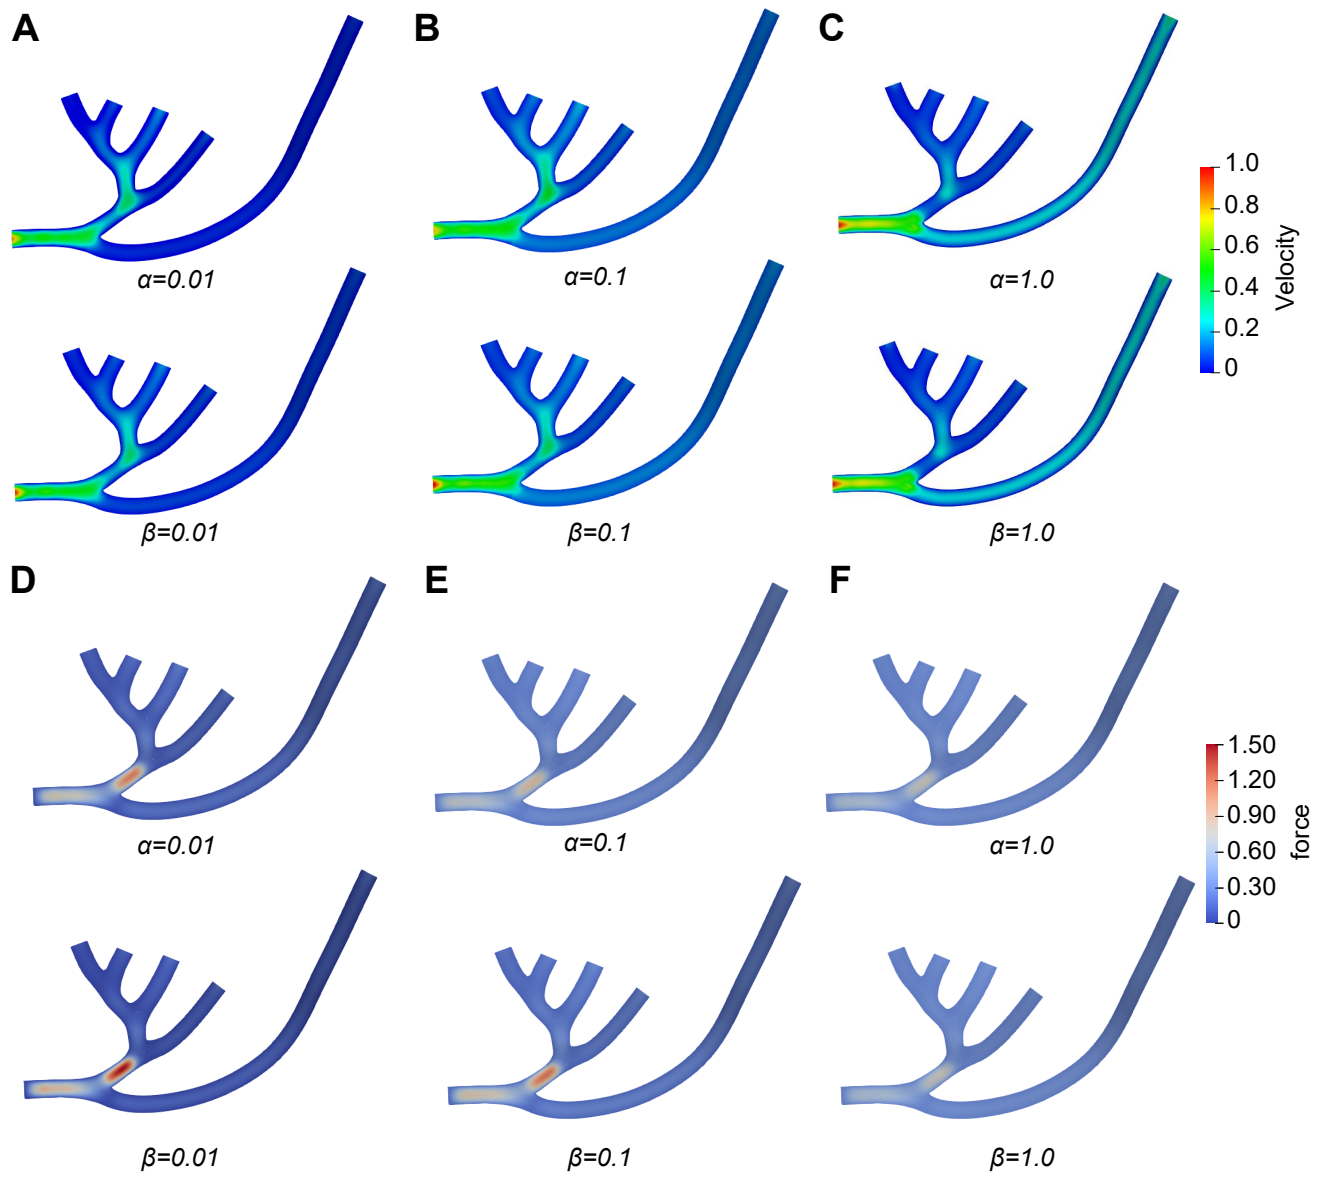

**Figure S4.** Simulation results in the neuron tree extracted from NMO\_54504 with different settings of penalty parameter  $\alpha$  and  $\beta$ . (A-C) Computed velocity field. (D-F) The distribution of control force. Unit for color bars: Velocity:  $\mu\text{m}/\text{s}$ ; Control force:  $\mu\text{m}/\text{s}^2$ .

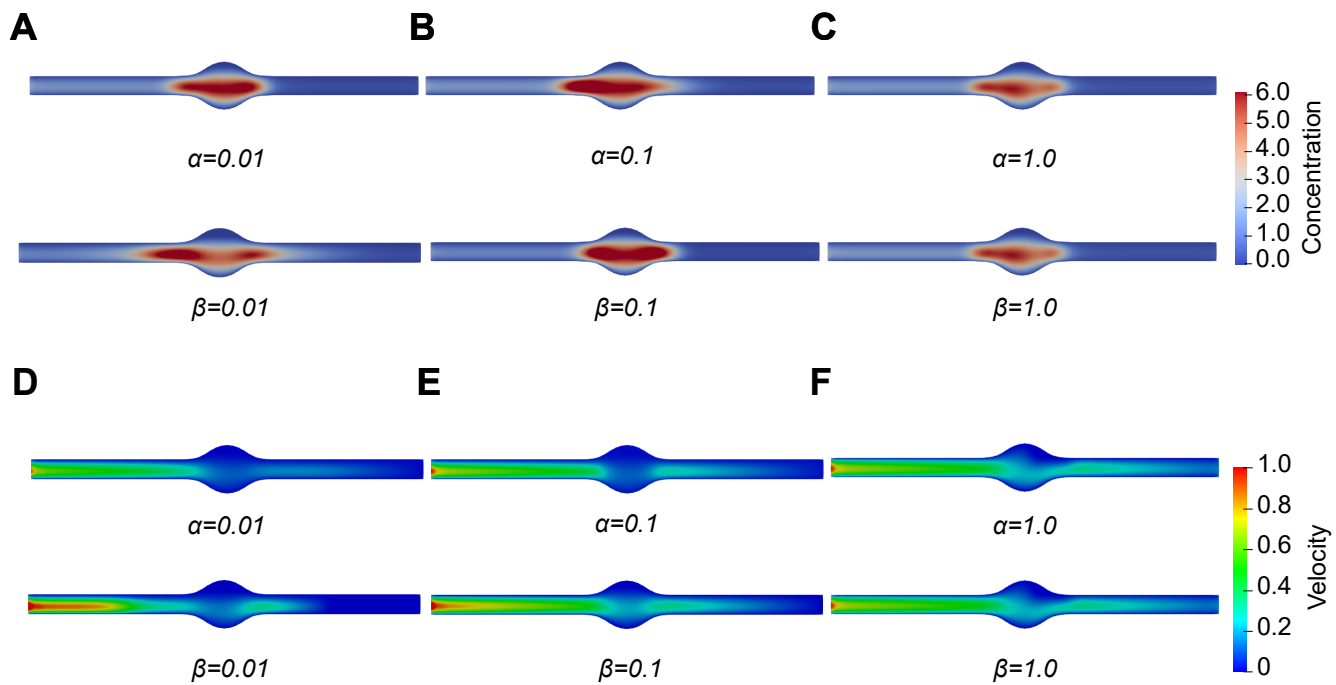

**Figure S5.** Simulation results in the pipe with swelling geometry with different settings of penalty parameter  $\alpha$  and  $\beta$ . (A-C) Material distribution. (D-F) Computed velocity field. Unit for color bars: Concentration:  $\text{mol}/\mu\text{m}^3$ ; Velocity:  $\mu\text{m}/\text{s}$ .

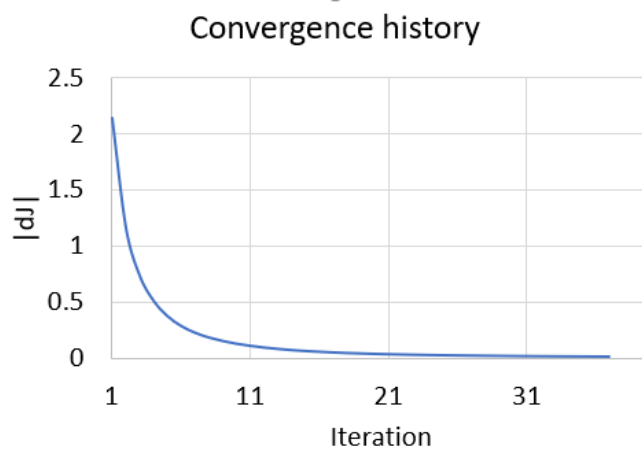

**Figure S6.** The convergence history of the simulation in single pipe geometry.
